# Supplementary material
Source: PubMed Central journal article supplement (PMC3298817)

# **The Structural Basis for Matrix Metalloproteinase 1 Catalyzed Collagenolysis**

Ivano Bertini, Marco Fragai, Claudio Luchinat, Maxime Melikian, Mirco Toccafondi

Janelle L. Lauer, Gregg B. Fields

**Supporting Information**

# INDEX

|                                                                                                                          |    |
|--------------------------------------------------------------------------------------------------------------------------|----|
| <b>Table S1.</b> Interchain NOEs from $^1\text{H}$ - $^{15}\text{N}$ NOESY-HSQC spectrum of the THP at 298 K             | 3  |
| <b>Table S2.</b> $^{15}\text{N}$ $R_1$ , $R_2$ , and NOEs for the THP at 298 K and 700 MHz                               | 5  |
| <b>Table S3.</b> $^1\text{H}$ and $^{15}\text{N}$ chemical shifts for the THP (pH 7.2, 298 K)                            | 7  |
| <b>Table S4.</b> $^{13}\text{C}$ resonance assignments for the THP (pH 7.2, 298K)                                        | 9  |
| <b>Table S5.</b> Upper limit distances for structure calculation from $^1\text{H}$ - $^{15}\text{N}$ NOESY-HSQC spectrum | 11 |
| <b>Table S6.</b> Torsion angles used for structure calculation                                                           | 17 |
| <b>Table S7.</b> Upper limit distances for <i>N</i> - and <i>C</i> -terminal residues                                    | 18 |
| <b>Table S8.</b> Torsion angles used for <i>N</i> - and <i>C</i> -terminal residues                                      | 19 |
| <b>Table S9.</b> Statistical analysis of the NMR structures of THP                                                       | 20 |
| <b>Figure S1.</b> Solution structure of the THP                                                                          | 21 |
| <b>Figure S2.</b> $^1\text{H}$ - $^{15}\text{N}$ HSQC spectra of the THP at 298, 310, and 316 K                          | 22 |
| <b>Figure S3.</b> Intensity changes observed in the THP upon addition of CAT domain                                      | 23 |
| <b>Figure S4.</b> Energetics of collagenolysis                                                                           | 24 |

Table S1. List of interchain NOEs connectivities from  $^1\text{H}$ - $^{15}\text{N}$  HSQC-NOESY spectrum of THP. Black stars (\*) correspond to those experiencing significant intensity decrease by addition of FL-MMP-1. Red triangles (▲) correspond to those experiencing significant intensity decrease by addition of the isolated HPX domain.

| Chain | Residue | Label | Chain | Residue | Label | Rem |
|-------|---------|-------|-------|---------|-------|-----|
| 1T    | Q15     | HA    | 2T    | G13     | H     | *   |
| 1T    | Q15     | H     | 2T    | P14     | HD3   |     |
| 1T    | Q15     | HE21  | 2T    | I17     | H     | ▲   |
| 1T    | Q15     | HE22  | 2T    | I17     | H     | ▲   |
| 1T    | Q15     | HE22  | 2T    | I17     | H     |     |
| 1T    | Q15     | HE21  | 2T    | I17     | H     |     |
| 1T    | G16     | H     | 2T    | P14     | HG3   |     |
| 1T    | G16     | H     | 2T    | P14     | HB3   |     |
| 1T    | G16     | H     | 2T    | P14     | HD3   |     |
| 1T    | A18     | HA    | 2T    | I17     | H     |     |
| 1T    | G19     | H     | 2T    | I17     | H     |     |
| 1T    | G19     | H     | 2T    | I17     | H     |     |
| 1T    | R21     | HA    | 2T    | Q20     | H     |     |
| 1T    | V23     | HG1   | 2T    | G22     | H     |     |
| 1T    | V24     | H     | 2T    | G22     | HA2   |     |
| 1T    | G25     | H     | 2T    | V23     | HB    | ▲   |
| 1T    | G25     | H     | 2T    | V23     | HA    |     |
| 1T    | L26     | H     | 2T    | V24     | HA    |     |
| 1T    | Q15     | HA    | 3T    | G13     | H     |     |
| 1T    | I17     | H     | 3T    | Q15     | HA    | *   |
| 1T    | I17     | H     | 3T    | G16     | H     |     |
| 1T    | I17     | HD1   | 3T    | G16     | H     |     |
| 1T    | I17     | H     | 3T    | G16     | H     | *   |
| 1T    | I17     | HG2   | 3T    | G16     | H     | *   |
| 1T    | I17     | HA    | 3T    | G16     | H     | *,▲ |
| 1T    | G19     | H     | 3T    | I17     | HB    | *   |
| 1T    | G19     | HA2   | 3T    | A18     | H     |     |
| 1T    | Q20     | H     | 3T    | Q15     | HE21  |     |
| 1T    | Q20     | H     | 3T    | Q15     | HG    |     |
| 1T    | Q20     | H     | 3T    | Q15     | HE22  | ▲   |
| 1T    | Q20     | H     | 3T    | Q15     | HE21  |     |
| 1T    | Q20     | H     | 3T    | Q15     | HE22  |     |
| 1T    | Q20     | H     | 3T    | A18     | HB    |     |
| 1T    | Q20     | H     | 3T    | A18     | HA    |     |
| 1T    | Q20     | H     | 3T    | G19     | H     | *   |
| 1T    | Q20     | HB3   | 3T    | G19     | H     |     |
| 1T    | Q20     | H     | 3T    | G19     | H     |     |
| 1T    | G22     | HA3   | 3T    | R21     | H     |     |
| 1T    | V23     | H     | 3T    | R21     | HA    |     |
| 1T    | V23     | H     | 3T    | R21     | HB2   |     |
| 1T    | V23     | HG2   | 3T    | R21     | H     |     |
| 1T    | V23     | H     | 3T    | G22     | H     |     |
| 1T    | V23     | H     | 3T    | G22     | H     |     |
| 1T    | V23     | HG2   | 3T    | G22     | H     |     |
| 1T    | V23     | HG1   | 3T    | G22     | H     |     |
| 1T    | G25     | HA2   | 3T    | V24     | H     |     |
| 1T    | L26     | H     | 3T    | G25     | H     | *,▲ |
| 1T    | L26     | H     | 3T    | G25     | H     | *   |

|    |     |     |    |     |     |   |
|----|-----|-----|----|-----|-----|---|
| 1T | L26 | HB  | 3T | G25 | H   |   |
| 2T | G13 | H   | 3T | G13 | H   |   |
| 2T | G13 | H   | 3T | G13 | H   |   |
| 2T | G13 | H   | 3T | P14 | HD3 | * |
| 2T | Q15 | H   | 3T | G13 | HA3 |   |
| 2T | Q15 | H   | 3T | P14 | HD3 |   |
| 2T | Q15 | HG  | 3T | I17 | H   |   |
| 2T | G16 | H   | 3T | P14 | HD3 |   |
| 2T | G16 | H   | 3T | P14 | HG2 |   |
| 2T | G16 | H   | 3T | P14 | HG3 |   |
| 2T | A18 | HB  | 3T | G16 | H   |   |
| 2T | A18 | HA  | 3T | I17 | H   |   |
| 2T | G19 | H   | 3T | I17 | HB  |   |
| 2T | G19 | H   | 3T | I17 | H   |   |
| 2T | G19 | H   | 3T | I17 | H   |   |
| 2T | R21 | HA  | 3T | Q20 | H   |   |
| 2T | R21 | HG3 | 3T | Q20 | H   | ▲ |
| 2T | R21 | HD2 | 3T | V23 | H   | * |
| 2T | R21 | HB2 | 3T | V23 | H   | * |
| 2T | R21 | HG3 | 3T | V23 | H   | * |
| 2T | G22 | HA3 | 3T | V23 | H   |   |
| 2T | V24 | H   | 3T | G22 | HA3 | * |
| 2T | G25 | H   | 3T | V23 | HB  | ▲ |

Table S2.  $^{15}\text{N}$   $R_1$ ,  $R_2$ , and NOEs for the THP at 298 K and 700 MHz.

| Chain I<br>(1T) | $R_1$ ( $\text{s}^{-1}$ ) |       |       | $R_2$ ( $\text{s}^{-1}$ ) |       |       | NOE  |
|-----------------|---------------------------|-------|-------|---------------------------|-------|-------|------|
|                 | Exp.                      | Error | Calc. | Exp.                      | Error | Calc. | Exp. |
| G13             | 1.68                      | 0.09  | 1.28  | 15.88                     | 3.20  | 23.09 | 0.68 |
| P14             |                           |       |       |                           |       |       |      |
| Q15             | 1.52                      | 0.13  | 1.28  | 19.66                     | 1.48  | 23.04 | 0.63 |
| G16             | 1.66                      | 0.09  | 1.29  | 20.03                     | 1.85  | 23.36 | 0.73 |
| I17             | 1.45                      | 0.09  | 1.21  | 18.31                     | 1.47  | 21.14 | 0.78 |
| A18             | 1.48                      | 0.13  | 1.23  |                           |       | 21.41 | 0.57 |
| G19             | 1.68                      | 0.11  | 1.29  | 16.45                     | 1.71  | 23.26 | 0.80 |
| Q20             | 1.47                      | 0.09  | 1.28  | 17.09                     | 2.28  | 22.83 | 0.72 |
| R21             | 1.64                      | 0.11  | 1.25  | 18.43                     | 2.38  | 22.08 | 0.72 |
| G22             |                           |       | 1.29  |                           |       | 23.36 |      |
| V23             | 1.55                      | 0.08  | 1.21  | 18.16                     | 1.69  | 21.05 | 0.77 |
| V24             | 1.51                      | 0.10  | 1.28  | 17.37                     | 1.97  | 23.09 | 0.78 |
| G25             | 1.70                      | 0.08  | 1.29  | 18.40                     | 2.10  | 23.31 | 0.77 |
| L26             | 1.62                      | 0.11  | 1.22  | 17.54                     | 2.56  | 21.28 | 0.76 |

| Chain II<br>(2T) | $R_1$ ( $\text{s}^{-1}$ ) |       |       | $R_2$ ( $\text{s}^{-1}$ ) |       |       | NOE  |
|------------------|---------------------------|-------|-------|---------------------------|-------|-------|------|
|                  | Exp.                      | Error | Calc. | Exp.                      | Error | Calc. | Exp. |
| G13              | 1.57                      | 0.13  | 1.27  | 15.77                     | 3.13  | 22.83 | 0.69 |
| P14              |                           |       |       |                           |       |       |      |
| Q15              | 1.62                      | 0.09  | 1.28  | 20.12                     | 2.47  | 22.99 | 0.72 |
| G16              | 1.63                      | 0.10  | 1.28  | 19.97                     | 3.67  | 23.04 | 0.76 |
| I17              | 1.62                      | 0.10  | 1.20  | 18.43                     | 2.42  | 20.79 | 0.75 |
| A18              |                           |       | 1.26  | 14.86                     | 2.26  | 22.47 | 0.86 |
| G19              | 1.54                      | 0.08  | 1.29  | 13.89                     | 1.56  | 23.26 | 0.77 |
| Q20              | 1.55                      | 0.10  | 1.12  | 15.16                     | 2.79  | 19.96 | 0.71 |
| R21              | 1.71                      | 0.15  | 1.28  | 19.23                     | 2.23  | 23.04 | 0.74 |
| G22              | 1.78                      | 0.18  | 1.27  |                           |       | 22.62 |      |
| V23              | 1.54                      | 0.09  | 1.21  | 16.46                     | 1.71  | 21.14 | 0.77 |
| V24              | 1.52                      | 0.08  | 1.28  | 18.04                     | 1.91  | 22.78 | 0.74 |
| G25              | 1.77                      | 0.13  | 1.27  | 18.16                     | 3.21  | 22.68 | 0.78 |
| L26              | 1.40                      | 0.09  | 1.28  | 17.16                     | 2.04  | 22.83 | 0.74 |

| Chain III<br>(3T) | $R_1$ ( $\text{s}^{-1}$ ) |       |       | $R_2$ ( $\text{s}^{-1}$ ) |       |       | NOE  |
|-------------------|---------------------------|-------|-------|---------------------------|-------|-------|------|
|                   | Exp.                      | Error | Calc. | Exp.                      | Error | Calc. | Exp. |
| G13               | 1.64                      | 0.12  | 1.29  | 16.31                     | 3.41  | 23.31 | 0.70 |
| P14               |                           |       |       |                           |       |       |      |

|     |      |      |      |       |      |       |      |
|-----|------|------|------|-------|------|-------|------|
| Q15 | 1.52 | 0.13 | 1.27 | 20.28 | 2.81 | 22.52 | 0.72 |
| G16 | 1.85 | 0.14 | 1.26 | 20.77 | 3.20 | 22.17 | 0.61 |
| I17 | 1.54 | 0.09 | 1.22 | 18.03 | 2.32 | 21.41 | 0.72 |
| A18 | 1.55 | 0.14 | 1.27 | 14.84 | 1.92 | 22.52 | 0.72 |
| G19 | 1.46 | 0.14 | 1.29 | 17.12 | 3.44 | 23.36 | 0.75 |
| Q20 | 1.53 | 0.08 | 1.18 | 16.59 | 2.32 | 20.58 | 0.74 |
| R21 | 1.81 | 0.09 | 1.29 | 20.25 | 1.60 | 23.26 | 0.73 |
| G22 | 1.83 | 0.17 | 1.29 | 20.05 | 3.64 | 23.26 | 0.58 |
| V23 | 1.63 | 0.11 | 1.19 | 17.65 | 1.72 | 20.66 | 0.75 |
| V24 | 1.56 | 0.09 | 1.29 | 17.95 | 2.10 | 23.26 | 0.79 |
| G25 | 1.73 | 0.10 | 1.26 | 14.72 | 2.19 | 22.32 | 0.72 |
| L26 | 1.59 | 0.12 | 1.23 | 18.66 | 2.69 | 21.55 | 0.76 |

| Monomeric chain (4M) | $R_1$ (s <sup>-1</sup> ) |       | $R_2$ (s <sup>-1</sup> ) |       | NOE   |
|----------------------|--------------------------|-------|--------------------------|-------|-------|
|                      | Exp.                     | Error | Exp.                     | Error |       |
| G13                  | 2.26                     | 0.38  | 4.27                     | 1.23  | -0.81 |
| P14                  |                          |       |                          |       |       |
| Q15                  | 2.34                     | 0.37  | 4.93                     | 1.26  | -0.31 |
| G16                  | 2.24                     | 0.38  | 5.48                     | 1.59  | -0.10 |
| I17                  | 2.44                     | 0.30  | 4.31                     | 0.98  | -0.15 |
| A18                  | 2.52                     | 0.37  | 4.97                     | 1.23  | -0.23 |
| G19                  | 2.36                     | 0.43  | 4.21                     | 1.02  | -0.24 |
| Q20                  | 2.47                     | 0.41  | 4.68                     | 1.20  | -0.19 |
| R21                  | 2.30                     | 0.39  | 4.73                     | 1.30  | -0.19 |
| G22                  | 2.10                     | 0.26  | 6.22                     | 1.57  |       |
| V23                  | 2.36                     | 0.30  | 3.58                     | 0.79  | -0.10 |
| V24                  | 2.07                     | 0.20  | 3.11                     | 0.68  | -0.19 |
| G25                  | 2.44                     | 0.38  | 4.38                     | 1.08  | -0.35 |
| L26                  | 2.21                     | 0.25  | 3.33                     | 0.74  | -0.29 |

Table S3.  $^1\text{H}$  and  $^{15}\text{N}$  Chemical Shifts for the THP (pH 7.2, 298 K).

| Chemical shifts (ppm) |      |        |            |      |           |      |            |      |      |            |                |        |                |      |
|-----------------------|------|--------|------------|------|-----------|------|------------|------|------|------------|----------------|--------|----------------|------|
| Chain I (1T)          |      |        |            |      |           |      |            |      |      |            |                |        |                |      |
| Residue               | HN   | N      | H $\alpha$ |      | H $\beta$ |      | H $\gamma$ |      |      | H $\delta$ | N $\epsilon$ 2 |        | H $\epsilon$ 2 |      |
| G13                   | 7.63 | 106.48 | 3.70       | 3.49 |           |      |            |      |      |            |                |        |                |      |
| P14                   |      |        | 4.24       |      | 2.11      | 1.67 | 1.92       | 1.74 |      | 3.33       | 3.02           |        |                |      |
| Q15                   | 8.31 | 121.43 | 4.08       |      | 1.73      |      | 2.74       |      |      |            |                | 111.15 | 7.46           | 6.66 |
| G16                   | 7.99 | 109.19 | 3.61       | 3.40 |           |      |            |      |      |            |                |        |                |      |
| I17                   | 7.84 | 114.25 | 4.02       |      | 1.81      |      | 1.20       | 0.99 | 0.87 | 0.70       |                |        |                |      |
| A18                   | 8.14 | 124.56 | 4.26       |      | 1.17      |      |            |      |      |            |                |        |                |      |
| G19                   | 8.43 | 105.53 | 3.50       | 3.39 |           |      |            |      |      |            |                |        |                |      |
| Q20                   | 8.54 | 120.23 | 3.95       |      | 1.88      | 1.71 | 2.28       |      |      |            |                | 112.04 | 7.42           | 6.70 |
| R21                   | 8.34 | 124.16 | 4.23       |      | 1.63      | 1.55 | 1.88       | 1.27 |      | 3.03       | 2.98           |        |                |      |
| G22                   | 8.25 | 109.92 | 3.42       | 3.60 |           |      |            |      |      |            |                |        |                |      |
| V23                   | 7.76 | 115.23 | 3.99       |      | 2.07      |      | 0.88       | 0.79 |      |            |                |        |                |      |
| V24                   | 7.61 | 122.83 | 4.02       |      | 1.79      |      | 0.90       | 0.81 |      |            |                |        |                |      |
| G25                   | 8.06 | 109.68 | 3.55       | 3.43 |           |      |            |      |      |            |                |        |                |      |
| L26                   | 8.54 | 121.72 | 4.24       |      | 1.37      |      | 1.50       |      |      | 0.79       | 0.81           |        |                |      |
| Chain II (2T)         |      |        |            |      |           |      |            |      |      |            |                |        |                |      |
| Residue               | HN   | N      | H $\alpha$ |      | H $\beta$ |      | H $\gamma$ |      |      | H $\delta$ | N $\epsilon$ 2 |        | H $\epsilon$ 2 |      |
| G13                   | 7.69 | 106.50 | 3.62       | 3.41 |           |      |            |      |      |            |                |        |                |      |
| P14                   |      |        | 4.30       |      | 2.15      | 1.74 | 1.89       | 1.80 |      | 3.32       | 3.03           |        |                |      |
| Q15                   | 8.44 | 121.63 | 4.06       |      | 1.74      |      | 2.79       |      |      |            |                | 111.35 | 7.48           | 6.67 |
| G16                   | 8.07 | 108.80 | 3.61       | 3.43 |           |      |            |      |      |            |                |        |                |      |
| I17                   | 8.20 | 116.18 | 3.95       |      | 1.78      |      | 1.19       | 1.01 | 0.84 | 0.71       |                |        |                |      |
| A18                   | 8.07 | 125.04 | 4.25       |      | 1.16      |      |            |      |      |            |                |        |                |      |
| G19                   | 8.46 | 106.02 | 3.51       | 3.32 |           |      |            |      |      |            |                |        |                |      |
| Q20                   | 8.20 | 119.92 | 4.01       |      | 1.91      | 1.64 | 2.39       |      |      |            |                | 112.54 | 7.47           | 6.70 |
| R21                   | 8.41 | 124.14 | 4.21       |      | 1.61      | 1.54 | 1.90       | 1.28 |      | 3.10       | 2.96           |        |                |      |
| G22                   | 8.26 | 109.59 | 3.57       | 3.43 |           |      |            |      |      |            |                |        |                |      |
| V23                   | 8.20 | 117.50 | 3.92       |      | 2.00      |      | 0.90       | 0.81 |      |            |                |        |                |      |
| V24                   | 7.45 | 123.13 | 3.90       |      | 1.76      |      | 0.89       | 0.82 |      |            |                |        |                |      |
| G25                   | 7.91 | 108.34 | 3.55       | 3.43 |           |      |            |      |      |            |                |        |                |      |
| L26                   | 8.19 | 120.23 | 4.22       |      | 1.33      |      | 1.65       |      |      | 0.77       | 0.79           |        |                |      |

## Chain III (3T)

| Residue | HN   | N      | H $\alpha$ | H $\beta$ | H $\gamma$     | H $\delta$ | N $\epsilon$ 2 | H $\epsilon$ 2 |
|---------|------|--------|------------|-----------|----------------|------------|----------------|----------------|
| G13     | 7.96 | 106.80 | 3.64 3.38  |           |                |            |                |                |
| P14     |      |        | 4.34       | 2.15 1.76 | 1.83 1.57      | 3.35 3.01  |                |                |
| Q15     | 8.37 | 122.14 | 4.27       | 1.71      | 2.85           |            | 110.98         | 7.47 6.85      |
| G16     | 8.15 | 109.23 | 3.58 3.43  |           |                |            |                |                |
| I17     | 8.20 | 117.00 | 3.91       | 1.73      | 1.24 0.99 0.83 | 0.72       |                |                |
| A18     | 8.11 | 125.63 | 4.28       | 1.18      |                |            |                |                |
| G19     | 8.26 | 105.18 | 3.54 3.36  |           |                |            |                |                |
| Q20     | 8.21 | 119.27 | 4.05       | 1.94 1.64 | 2.34           |            | 112.67         | 7.48 6.71      |
| R21     | 8.36 | 123.79 | 4.21       | 1.54 1.50 | 1.97 1.37      | 3.08 2.98  |                |                |
| G22     | 8.30 | 109.95 | 3.45 3.54  |           |                |            |                |                |
| V23     | 8.33 | 118.40 | 3.86       | 1.99      | 0.90 0.78      |            |                |                |
| V24     | 7.50 | 122.96 | 3.86       | 1.77      | 0.88 0.83      |            |                |                |
| G25     | 7.89 | 108.15 | 3.56 3.39  |           |                |            |                |                |
| L26     | 7.94 | 117.64 | 4.16       | 1.31      | 1.62           | 0.78 0.81  |                |                |

## Monomeric chain (4M)

| Residue | HN   | N      | H $\alpha$ | H $\beta$ | H $\gamma$     | H $\delta$ | N $\epsilon$ 2 | H $\epsilon$ 2 |
|---------|------|--------|------------|-----------|----------------|------------|----------------|----------------|
| G13     | 8.13 | 114.29 | 3.76       |           |                |            |                |                |
| P14     |      |        | 4.23       | 2.11 1.75 | 1.84           | 3.46       |                |                |
| Q15     | 8.41 | 120.16 | 4.18       | 1.82      | 2.23 2.17      |            | 112.17         | 7.37 6.69      |
| G16     | 8.20 | 109.61 | 3.69       |           |                |            |                |                |
| I17     | 7.86 | 119.85 | 4.00       | 1.67      | 1.26 0.99 0.73 | 0.68       |                |                |
| A18     | 8.26 | 127.68 | 4.12       | 1.22      |                |            |                |                |
| G19     | 8.16 | 107.96 | 3.79 3.68  |           |                |            |                |                |
| Q20     | 8.00 | 119.67 | 4.16       | 1.82      | 1.82 1.95      |            | 112.64         | 7.35 6.69      |
| R21     | 8.28 | 122.09 | 4.16       | 1.61 1.70 | 1.49           | 3.03       |                |                |
| G22     | 8.24 | 109.89 | 3.48 3.46  |           |                |            |                |                |
| V23     | 7.85 | 119.53 | 3.96       | 1.88      | 0.77 0.74      |            |                |                |
| V24     | 8.09 | 124.42 | 3.94       | 1.87      | 0.73 0.76      |            |                |                |
| G25     | 8.28 | 112.71 | 3.79 3.76  |           |                |            |                |                |
| L26     | 7.96 | 122.59 | 4.46       | 1.38      | 1.46           | 0.76 0.73  |                |                |



Table S4.  $^{13}\text{C}$  Resonance Assignments for the THP (pH 7.2, 298 K).

| Chemical shifts (ppm) |        |            |           |            |       |             |
|-----------------------|--------|------------|-----------|------------|-------|-------------|
| Chain I (1T)          |        |            |           |            |       |             |
| Residue               | CO     | C $\alpha$ | C $\beta$ | C $\gamma$ |       | C $\delta$  |
| G13                   | 170.00 | 45.80      |           |            |       |             |
| P14                   | 176.53 | 62.26      | 32.41     | 27.61      |       | 49.87       |
| Q15                   | 176.84 | 56.11      | 28.29     | 33.88      |       | 180.52      |
| G16                   | 173.07 | 45.20      |           |            |       |             |
| I17                   | 175.90 | 61.74      | 39.73     | 26.04      | 17.86 | 13.98       |
| A18                   | 179.84 | 52.46      | 19.76     |            |       |             |
| G19                   | 172.84 | 45.18      |           |            |       |             |
| Q20                   | 175.69 | 55.74      | 29.98     | 34.01      |       | 180.90      |
| R21                   | 177.59 | 56.91      | 30.33     | 27.55      |       | 44.15       |
| G22                   | 173.06 | 45.02      |           |            |       |             |
| V23                   | 175.39 | 61.61      | 33.28     | 21.50      | 19.39 |             |
| V24                   | 176.15 | 62.38      | 32.19     | 22.44      | 20.58 |             |
| G25                   | 173.30 | 45.40      |           |            |       |             |
| L26                   | 174.65 | 53.94      | 41.31     | 27.69      |       | 23.24 22.83 |

## Chain II (2T)

| Residue | CO     | C $\alpha$ | C $\beta$ | C $\gamma$ |       | C $\delta$  |
|---------|--------|------------|-----------|------------|-------|-------------|
| G13     | 170.08 | 45.80      |           |            |       |             |
| P14     | 176.68 | 62.24      | 32.44     | 27.34      |       | 49.73       |
| Q15     | 176.92 | 56.06      | 28.32     | 33.75      |       | 180.48      |
| G16     | 172.88 | 45.36      |           |            |       |             |
| I17     | 175.52 | 61.80      | 39.24     | 26.19      | 17.78 | 13.79       |
| A18     | 179.64 | 52.50      | 19.57     |            |       |             |
| G19     | 173.33 | 44.91      |           |            |       |             |
| Q20     | 175.59 | 55.49      | 30.21     | 34.14      |       | 180.68      |
| R21     | 177.48 | 57.09      | 30.41     | 27.67      |       | 44.32       |
| G22     | 172.95 | 45.21      |           |            |       |             |
| V23     | 175.00 | 62.06      | 33.16     | 21.84      | 20.34 |             |
| V24     | 175.27 | 62.29      | 31.98     | 22.30      | 20.42 |             |
| G25     | 173.40 | 45.13      |           |            |       |             |
| L26     | 175.10 | 53.76      | 41.23     | 27.17      |       | 23.00 22.51 |

## Chain III (3T)

| Residue | CO     | C $\alpha$ | C $\beta$ | C $\gamma$ |       | C $\delta$  |
|---------|--------|------------|-----------|------------|-------|-------------|
| G13     | 170.35 | 45.60      |           |            |       |             |
| P14     | 176.26 | 62.20      | 32.47     | 27.25      |       | 49.79       |
| Q15     | 177.28 | 55.95      | 27.80     | 33.56      |       | 181.02      |
| G16     | 172.94 | 45.44      |           |            |       |             |
| I17     | 175.60 | 61.78      | 39.07     | 26.33      | 17.68 | 13.77       |
| A18     | 179.57 | 52.43      | 19.29     |            |       |             |
| G19     | 173.36 | 44.75      |           |            |       |             |
| Q20     | 175.54 | 55.49      | 30.29     | 34.29      |       | 180.60      |
| R21     | 177.31 | 56.94      | 30.67     | 27.34      |       | 44.53       |
| G22     | 173.07 | 45.39      |           |            |       |             |
| V23     | 174.94 | 62.23      | 32.89     | 21.60      | 20.63 |             |
| V24     | 175.48 | 62.54      | 32.21     | 21.97      | 20.34 |             |
| G25     | 172.64 | 45.20      |           |            |       |             |
| L26     | 175.23 | 53.76      | 41.10     | 27.33      |       | 22.66 23.06 |

## Monomeric chain (4M)

| Residue | CO     | C $\alpha$ | C $\beta$ | C $\gamma$ |       | C $\delta$  |
|---------|--------|------------|-----------|------------|-------|-------------|
| G13     | 174.57 | 45.49      |           |            |       |             |
| P14     | 177.61 | 63.56      | 32.26     | 27.41      |       | 49.96       |
| Q15     | 176.86 | 56.10      | 29.80     | 34.01      |       | 180.89      |
| G16     | 174.38 | 45.51      |           |            |       |             |
| I17     | 176.56 | 61.38      | 38.97     | 27.36      | 17.55 | 13.14       |
| A18     | 178.59 | 53.12      | 19.10     |            |       |             |
| G19     | 174.51 | 45.52      |           |            |       |             |
| Q20     | 176.37 | 56.09      | 29.57     | 34.01      |       | 180.66      |
| R21     | 177.00 | 56.52      | 30.87     | 27.32      |       | 43.56       |
| G22     | 174.08 | 45.39      |           |            |       |             |
| V23     | 176.54 | 62.46      | 32.94     | 21.02      | 20.83 |             |
| V24     | 176.70 | 62.64      | 33.00     | 21.37      | 21.28 |             |
| G25     | 173.80 | 45.17      |           |            |       |             |
| L26     | 176.02 | 53.20      | 42.04     | 27.14      |       | 25.17 23.53 |

Table S5. Upper limit distances on THP structure calculation from  $^1\text{H}$ - $^{15}\text{N}$  HSQC-NOESY spectrum.

| Intra Residue |         |       |       |         |       |              |          |
|---------------|---------|-------|-------|---------|-------|--------------|----------|
| Chain         | Residue | Label | Chain | Residue | Label | Distance (Å) | Volume   |
| 1T            | Q15     | H     | 1T    | Q15     | HE21  | 5.50         | 8.54E+03 |
| 1T            | Q15     | H     | 1T    | Q15     | HE22  | 5.50         | 3.26E+03 |
| 1T            | Q15     | H     | 1T    | Q15     | QB    | 3.30         | 2.05E+05 |
| 1T            | Q15     | H     | 1T    | Q15     | QG    | 4.64         | 2.64E+04 |
| 1T            | Q15     | HA    | 1T    | Q15     | HE21  | 5.15         | 1.94E+04 |
| 1T            | Q15     | HA    | 1T    | Q15     | HE22  | 5.15         | 1.42E+04 |
| 1T            | Q15     | HA    | 1T    | Q15     | QE2   | 4.46         | 1.94E+04 |
| 1T            | Q15     | QB    | 1T    | Q15     | QE2   | 3.92         | 6.37E+04 |
| 1T            | I17     | H     | 1T    | I17     | HB    | 4.21         | 4.74E+04 |
| 1T            | I17     | H     | 1T    | I17     | HG12  | 4.25         | 4.50E+04 |
| 1T            | I17     | H     | 1T    | I17     | HG13  | 4.25         | 4.98E+04 |
| 1T            | I17     | H     | 1T    | I17     | QD1   | 4.52         | 3.09E+04 |
| 1T            | I17     | H     | 1T    | I17     | QG2   | 4.00         | 6.45E+04 |
| 1T            | A18     | H     | 1T    | A18     | QB    | 3.56         | 1.29E+05 |
| 1T            | Q20     | H     | 1T    | Q20     | HB2   | 4.05         | 6.01E+04 |
| 1T            | Q20     | H     | 1T    | Q20     | HB3   | 4.05         | 8.37E+04 |
| 1T            | Q20     | H     | 1T    | Q20     | HE21  | 5.50         | 1.04E+04 |
| 1T            | Q20     | H     | 1T    | Q20     | HE22  | 5.50         | 1.45E+03 |
| 1T            | Q20     | H     | 1T    | Q20     | QB    | 3.50         | 8.37E+04 |
| 1T            | Q20     | H     | 1T    | Q20     | QG    | 4.25         | 4.50E+04 |
| 1T            | Q20     | HA    | 1T    | Q20     | HE21  | 5.50         | 7.10E+03 |
| 1T            | Q20     | HA    | 1T    | Q20     | HE22  | 5.50         | 1.04E+04 |
| 1T            | Q20     | HB2   | 1T    | Q20     | HE21  | 5.50         | 1.09E+04 |
| 1T            | Q20     | HB2   | 1T    | Q20     | HE22  | 5.50         | 1.12E+04 |
| 1T            | Q20     | HB3   | 1T    | Q20     | HE21  | 5.50         | 1.08E+04 |
| 1T            | Q20     | HB3   | 1T    | Q20     | HE22  | 5.50         | 8.75E+03 |
| 1T            | Q20     | QB    | 1T    | Q20     | QE2   | 4.29         | 1.12E+04 |
| 1T            | R21     | H     | 1T    | R21     | HD2   | 5.50         | 5.58E+03 |
| 1T            | R21     | H     | 1T    | R21     | HD3   | 5.50         | 9.62E+03 |
| 1T            | R21     | H     | 1T    | R21     | HG2   | 4.82         | 4.74E+04 |
| 1T            | R21     | H     | 1T    | R21     | HG3   | 4.82         | 2.12E+04 |
| 1T            | R21     | H     | 1T    | R21     | QB    | 3.49         | 1.00E+05 |
| 1T            | R21     | H     | 1T    | R21     | QG    | 3.96         | 4.74E+04 |
| 1T            | V23     | H     | 1T    | V23     | QG1   | 3.73         | 9.84E+04 |
| 1T            | V23     | H     | 1T    | V23     | QG2   | 3.73         | 9.84E+04 |
| 1T            | V24     | H     | 1T    | V24     | HB    | 3.77         | 9.26E+04 |
| 1T            | V24     | H     | 1T    | V24     | QG1   | 3.71         | 1.25E+05 |
| 1T            | V24     | H     | 1T    | V24     | QG2   | 3.71         | 1.02E+05 |
| 1T            | V24     | H     | 1T    | V24     | QQG   | 3.24         | 1.25E+05 |
| 1T            | L26     | H     | 1T    | L26     | HG    | 4.06         | 5.88E+04 |
| 1T            | L26     | H     | 1T    | L26     | QB    | 3.81         | 8.63E+04 |
| 1T            | L26     | H     | 1T    | L26     | QD1   | 4.41         | 3.64E+04 |
| 1T            | L26     | H     | 1T    | L26     | QD2   | 4.41         | 3.61E+04 |
| 2T            | Q15     | H     | 2T    | Q15     | HE21  | 5.50         | 3.21E+03 |
| 2T            | Q15     | H     | 2T    | Q15     | HE22  | 5.50         | 2.11E+03 |
| 2T            | Q15     | H     | 2T    | Q15     | QB    | 3.54         | 1.35E+05 |
| 2T            | Q15     | H     | 2T    | Q15     | QG    | 4.95         | 1.80E+04 |
| 2T            | Q15     | HA    | 2T    | Q15     | HE21  | 5.50         | 1.08E+04 |
| 2T            | Q15     | HA    | 2T    | Q15     | HE22  | 5.50         | 3.99E+03 |
| 2T            | Q15     | HA    | 2T    | Q15     | QE2   | 4.85         | 1.08E+04 |
| 2T            | Q15     | QB    | 2T    | Q15     | HE21  | 4.75         | 2.29E+04 |
| 2T            | Q15     | QB    | 2T    | Q15     | HE22  | 4.75         | 2.79E+04 |
| 2T            | Q15     | QB    | 2T    | Q15     | QE2   | 4.16         | 2.79E+04 |
| 2T            | I17     | H     | 2T    | I17     | HG12  | 4.63         | 4.36E+04 |
| 2T            | I17     | H     | 2T    | I17     | HG13  | 4.63         | 2.68E+04 |

|    |     |     |    |     |      |      |          |
|----|-----|-----|----|-----|------|------|----------|
| 2T | I17 | H   | 2T | I17 | QD1  | 4.77 | 2.25E+04 |
| 2T | I17 | H   | 2T | I17 | QG1  | 3.94 | 4.36E+04 |
| 2T | I17 | H   | 2T | I17 | QG2  | 4.30 | 4.18E+04 |
| 2T | A18 | H   | 2T | A18 | QB   | 3.42 | 1.64E+05 |
| 2T | Q20 | H   | 2T | Q20 | HB2  | 4.00 | 6.44E+04 |
| 2T | Q20 | H   | 2T | Q20 | HB3  | 4.00 | 6.49E+04 |
| 2T | Q20 | H   | 2T | Q20 | HE21 | 5.50 | 3.53E+03 |
| 2T | Q20 | H   | 2T | Q20 | HE22 | 5.50 | 1.48E+03 |
| 2T | Q20 | H   | 2T | Q20 | QG   | 4.07 | 5.83E+04 |
| 2T | Q20 | HA  | 2T | Q20 | HE21 | 5.50 | 2.93E+03 |
| 2T | Q20 | HA  | 2T | Q20 | HE22 | 5.50 | 3.90E+02 |
| 2T | Q20 | QB  | 2T | Q20 | QE2  | 4.53 | 3.22E+03 |
| 2T | R21 | H   | 2T | R21 | HB2  | 3.98 | 6.71E+04 |
| 2T | R21 | H   | 2T | R21 | HB3  | 3.98 | 6.68E+04 |
| 2T | R21 | H   | 2T | R21 | HD2  | 5.50 | 8.37E+03 |
| 2T | R21 | H   | 2T | R21 | HD3  | 5.50 | 8.45E+03 |
| 2T | R21 | H   | 2T | R21 | QG   | 4.07 | 4.36E+04 |
| 2T | V23 | H   | 2T | V23 | HB   | 3.90 | 7.45E+04 |
| 2T | V23 | H   | 2T | V23 | QG1  | 3.87 | 8.67E+04 |
| 2T | V23 | H   | 2T | V23 | QG2  | 3.87 | 7.85E+04 |
| 2T | V24 | H   | 2T | V24 | HB   | 3.70 | 1.02E+05 |
| 2T | V24 | H   | 2T | V24 | QG1  | 3.67 | 1.09E+05 |
| 2T | V24 | H   | 2T | V24 | QG2  | 3.67 | 1.12E+05 |
| 2T | L26 | H   | 2T | L26 | HG   | 3.84 | 8.29E+04 |
| 2T | L26 | H   | 2T | L26 | QB   | 3.67 | 1.08E+05 |
| 2T | L26 | H   | 2T | L26 | QGD  | 3.65 | 1.08E+05 |
|    |     |     |    |     |      |      |          |
| 3T | Q15 | H   | 3T | Q15 | HE21 | 5.50 | 1.62E+04 |
| 3T | Q15 | H   | 3T | Q15 | HE22 | 5.50 | 9.02E+03 |
| 3T | Q15 | H   | 3T | Q15 | QB   | 3.52 | 1.39E+05 |
| 3T | Q15 | H   | 3T | Q15 | QE2  | 4.66 | 1.62E+04 |
| 3T | Q15 | H   | 3T | Q15 | QG   | 4.89 | 1.93E+04 |
| 3T | Q15 | HA  | 3T | Q15 | HE21 | 5.12 | 2.79E+04 |
| 3T | Q15 | HA  | 3T | Q15 | HE22 | 5.12 | 1.47E+04 |
| 3T | Q15 | HA  | 3T | Q15 | QE2  | 4.29 | 2.79E+04 |
| 3T | Q15 | QB  | 3T | Q15 | QE2  | 3.50 | 1.10E+05 |
| 3T | I17 | H   | 3T | I17 | HB   | 4.08 | 5.76E+04 |
| 3T | I17 | H   | 3T | I17 | HG12 | 4.29 | 5.33E+04 |
| 3T | I17 | H   | 3T | I17 | HG13 | 4.29 | 4.25E+04 |
| 3T | I17 | H   | 3T | I17 | QD1  | 4.78 | 2.21E+04 |
| 3T | I17 | H   | 3T | I17 | QG1  | 3.75 | 5.33E+04 |
| 3T | I17 | H   | 3T | I17 | QG2  | 3.92 | 7.31E+04 |
| 3T | A18 | H   | 3T | A18 | QB   | 3.47 | 1.51E+05 |
| 3T | Q20 | H   | 3T | Q20 | HB2  | 4.10 | 5.53E+04 |
| 3T | Q20 | H   | 3T | Q20 | HB3  | 4.10 | 9.92E+04 |
| 3T | Q20 | H   | 3T | Q20 | HE21 | 5.50 | 1.48E+03 |
| 3T | Q20 | H   | 3T | Q20 | HE22 | 5.50 | 9.55E+03 |
| 3T | Q20 | H   | 3T | Q20 | QB   | 3.46 | 9.92E+04 |
| 3T | Q20 | H   | 3T | Q20 | QG   | 4.13 | 5.29E+04 |
| 3T | Q20 | HA  | 3T | Q20 | HE21 | 5.50 | 4.80E+03 |
| 3T | Q20 | HA  | 3T | Q20 | HE22 | 5.50 | 6.24E+03 |
| 3T | Q20 | HB2 | 3T | Q20 | HE21 | 5.50 | 4.56E+03 |
| 3T | Q20 | HB2 | 3T | Q20 | HE22 | 5.50 | 6.49E+03 |
| 3T | Q20 | HB3 | 3T | Q20 | HE21 | 5.50 | 5.05E+03 |
| 3T | Q20 | HB3 | 3T | Q20 | HE22 | 5.50 | 6.88E+03 |
| 3T | R21 | H   | 3T | R21 | HB2  | 3.95 | 7.65E+04 |
| 3T | R21 | H   | 3T | R21 | HB3  | 3.95 | 6.92E+04 |
| 3T | R21 | H   | 3T | R21 | HD2  | 5.50 | 1.17E+04 |
| 3T | R21 | H   | 3T | R21 | HD3  | 5.50 | 8.79E+03 |
| 3T | R21 | H   | 3T | R21 | QD   | 4.82 | 1.17E+04 |
| 3T | R21 | H   | 3T | R21 | QG   | 4.03 | 5.26E+04 |
| 3T | V23 | H   | 3T | V23 | HB   | 3.94 | 7.11E+04 |
| 3T | V23 | H   | 3T | V23 | QG1  | 3.71 | 1.02E+05 |

|            |     |      |    |     |     |      |          |
|------------|-----|------|----|-----|-----|------|----------|
| 3T         | V23 | H    | 3T | V23 | QG2 | 3.71 | 1.02E+05 |
| 3T         | V24 | H    | 3T | V24 | HB  | 3.64 | 1.13E+05 |
| 3T         | V24 | H    | 3T | V24 | QG1 | 3.73 | 9.87E+04 |
| 3T         | V24 | H    | 3T | V24 | QG2 | 3.73 | 9.88E+04 |
| 3T         | L26 | H    | 3T | L26 | HG  | 4.00 | 6.45E+04 |
| 3T         | L26 | H    | 3T | L26 | QB  | 3.75 | 9.44E+04 |
| 3T         | L26 | H    | 3T | L26 | QD1 | 4.15 | 5.19E+04 |
| 3T         | L26 | H    | 3T | L26 | QD2 | 4.15 | 5.43E+04 |
| Sequential |     |      |    |     |     |      |          |
| 1T         | G13 | H    | 1T | P14 | QD  | 4.29 | 3.73E+04 |
| 1T         | P14 | HA   | 1T | Q15 | H   | 3.47 | 1.50E+05 |
| 1T         | P14 | QB   | 1T | Q15 | H   | 3.91 | 4.89E+04 |
| 1T         | Q15 | H    | 1T | G16 | H   | 4.64 | 2.66E+04 |
| 1T         | Q15 | HE21 | 1T | G16 | H   | 5.11 | 1.49E+04 |
| 1T         | Q15 | HE22 | 1T | G16 | H   | 5.11 | 1.49E+04 |
| 1T         | Q15 | QG   | 1T | G16 | H   | 4.57 | 2.90E+04 |
| 1T         | I17 | H    | 1T | A18 | H   | 5.50 | 9.29E+03 |
| 1T         | I17 | HA   | 1T | A18 | H   | 3.55 | 1.32E+05 |
| 1T         | I17 | HB   | 1T | A18 | H   | 4.19 | 4.86E+04 |
| 1T         | I17 | QG2  | 1T | A18 | H   | 4.26 | 4.40E+04 |
| 1T         | A18 | H    | 1T | G19 | H   | 4.43 | 3.48E+04 |
| 1T         | A18 | QB   | 1T | G19 | H   | 4.05 | 5.97E+04 |
| 1T         | Q20 | HA   | 1T | R21 | H   | 3.47 | 1.50E+05 |
| 1T         | Q20 | QG   | 1T | R21 | H   | 5.06 | 1.58E+04 |
| 1T         | R21 | HA   | 1T | G22 | H   | 3.55 | 1.31E+05 |
| 1T         | R21 | HB2  | 1T | G22 | H   | 4.72 | 3.44E+04 |
| 1T         | R21 | HB3  | 1T | G22 | H   | 4.72 | 2.39E+04 |
| 1T         | R21 | HG2  | 1T | G22 | H   | 4.27 | 4.44E+04 |
| 1T         | R21 | HG3  | 1T | G22 | H   | 4.27 | 4.38E+04 |
| 1T         | R21 | QB   | 1T | G22 | H   | 4.07 | 3.44E+04 |
| 1T         | R21 | QD   | 1T | G22 | H   | 5.05 | 1.35E+04 |
| 1T         | G22 | H    | 1T | V23 | H   | 4.63 | 2.67E+04 |
| 1T         | G22 | QA   | 1T | V23 | H   | 3.13 | 1.54E+05 |
| 1T         | V23 | HB   | 1T | V24 | H   | 4.10 | 5.60E+04 |
| 1T         | V24 | H    | 1T | G25 | H   | 4.70 | 2.44E+04 |
| 1T         | V24 | HB   | 1T | G25 | H   | 4.53 | 3.05E+04 |
| 1T         | V24 | QQG  | 1T | G25 | H   | 3.71 | 9.86E+04 |
| 1T         | G25 | H    | 1T | L26 | H   | 5.17 | 1.39E+04 |
| 2T         | G13 | H    | 2T | P14 | QD  | 4.29 | 3.76E+04 |
| 2T         | P14 | QB   | 2T | Q15 | H   | 4.11 | 2.94E+04 |
| 2T         | Q15 | H    | 2T | G16 | H   | 4.86 | 2.00E+04 |
| 2T         | Q15 | HE21 | 2T | G16 | H   | 5.50 | 4.43E+03 |
| 2T         | Q15 | HE22 | 2T | G16 | H   | 5.50 | 1.04E+04 |
| 2T         | Q15 | QG   | 2T | G16 | H   | 4.57 | 2.91E+04 |
| 2T         | I17 | HA   | 2T | A18 | H   | 3.30 | 2.04E+05 |
| 2T         | I17 | HB   | 2T | A18 | H   | 4.23 | 4.64E+04 |
| 2T         | I17 | QG2  | 2T | A18 | H   | 4.07 | 5.84E+04 |
| 2T         | A18 | QB   | 2T | G19 | H   | 4.05 | 5.99E+04 |
| 2T         | Q20 | QG   | 2T | R21 | H   | 4.98 | 1.72E+04 |
| 2T         | R21 | HB2  | 2T | G22 | H   | 5.03 | 1.64E+04 |
| 2T         | R21 | HB3  | 2T | G22 | H   | 5.03 | 2.47E+04 |
| 2T         | R21 | HG2  | 2T | G22 | H   | 4.35 | 4.36E+04 |
| 2T         | R21 | HG3  | 2T | G22 | H   | 4.35 | 3.89E+04 |
| 2T         | R21 | QB   | 2T | G22 | H   | 4.31 | 2.47E+04 |
| 2T         | R21 | QD   | 2T | G22 | H   | 5.21 | 1.12E+04 |
| 2T         | V23 | H    | 2T | V24 | H   | 4.71 | 2.41E+04 |
| 2T         | V23 | HB   | 2T | V24 | H   | 4.17 | 5.03E+04 |
| 2T         | V24 | H    | 2T | G25 | H   | 5.11 | 1.49E+04 |
| 2T         | V24 | HB   | 2T | G25 | H   | 4.55 | 2.99E+04 |

|            |     |      |    |     |     |      |          |
|------------|-----|------|----|-----|-----|------|----------|
| 2T         | V24 | QG1  | 2T | G25 | H   | 4.07 | 7.49E+04 |
| 2T         | V24 | QG2  | 2T | G25 | H   | 4.07 | 5.77E+04 |
| 2T         | V24 | QQG  | 2T | G25 | H   | 3.54 | 7.49E+04 |
| 2T         | G25 | H    | 2T | L26 | H   | 4.27 | 4.37E+04 |
|            |     |      |    |     |     |      |          |
| 3T         | G13 | H    | 3T | P14 | QD  | 4.45 | 2.98E+04 |
| 3T         | P14 | QB   | 3T | Q15 | H   | 4.05 | 3.49E+04 |
| 3T         | Q15 | QB   | 3T | G16 | H   | 4.35 | 3.90E+04 |
| 3T         | Q15 | QE2  | 3T | G16 | H   | 4.18 | 3.80E+04 |
| 3T         | Q15 | QG   | 3T | G16 | H   | 4.56 | 2.95E+04 |
| 3T         | I17 | HA   | 3T | A18 | H   | 3.41 | 1.68E+05 |
| 3T         | I17 | HB   | 3T | A18 | H   | 4.10 | 5.53E+04 |
| 3T         | I17 | QG2  | 3T | A18 | H   | 4.20 | 4.80E+04 |
| 3T         | I17 | QG2  | 3T | G19 | H   | 5.50 | 5.71E+03 |
| 3T         | A18 | QB   | 3T | G19 | H   | 4.12 | 5.41E+04 |
| 3T         | Q20 | HA   | 3T | R21 | H   | 3.54 | 1.34E+05 |
| 3T         | Q20 | QG   | 3T | R21 | H   | 4.88 | 1.96E+04 |
| 3T         | R21 | HD2  | 3T | G22 | H   | 5.46 | 9.96E+03 |
| 3T         | R21 | HD3  | 3T | G22 | H   | 5.46 | 1.04E+04 |
| 3T         | R21 | HG2  | 3T | G22 | H   | 4.29 | 4.68E+04 |
| 3T         | R21 | HG3  | 3T | G22 | H   | 4.29 | 4.26E+04 |
| 3T         | R21 | QB   | 3T | G22 | H   | 4.20 | 4.31E+04 |
| 3T         | G22 | QA   | 3T | V23 | H   | 3.10 | 1.70E+05 |
| 3T         | V23 | H    | 3T | V24 | H   | 4.94 | 1.83E+04 |
| 3T         | V23 | HB   | 3T | V24 | H   | 4.13 | 5.31E+04 |
| 3T         | V24 | H    | 3T | G25 | H   | 4.89 | 1.92E+04 |
| 3T         | V24 | HB   | 3T | G25 | H   | 4.56 | 2.94E+04 |
| 3T         | V24 | QG1  | 3T | G25 | H   | 4.18 | 6.31E+04 |
| 3T         | V24 | QG2  | 3T | G25 | H   | 4.18 | 4.93E+04 |
| 3T         | V24 | QQG  | 3T | G25 | H   | 3.64 | 6.31E+04 |
|            |     |      |    |     |     |      |          |
| Interchain |     |      |    |     |     |      |          |
|            |     |      |    |     |     |      |          |
| 1T         | Q15 | H    | 2T | G13 | QA  | 4.40 | 1.95E+04 |
| 1T         | Q15 | H    | 2T | G13 | HA2 | 5.01 | 1.68E+04 |
| 1T         | Q15 | H    | 2T | G13 | HA3 | 5.01 | 1.95E+04 |
| 1T         | Q15 | HA   | 2T | G13 | H   | 5.50 | 7.07E+03 |
| 1T         | Q15 | H    | 2T | P14 | QD  | 4.85 | 1.76E+04 |
| 1T         | Q15 | HE21 | 2T | I17 | H   | 5.11 | 1.48E+04 |
| 1T         | Q15 | HE22 | 2T | I17 | H   | 5.11 | 2.51E+04 |
| 1T         | Q15 | QE2  | 2T | I17 | H   | 4.33 | 2.51E+04 |
| 1T         | Q15 | QG   | 2T | I17 | H   | 4.74 | 2.34E+04 |
| 1T         | G16 | H    | 2T | P14 | QG  | 3.89 | 6.81E+04 |
| 1T         | G16 | H    | 2T | P14 | QD  | 4.67 | 2.23E+04 |
| 1T         | A18 | H    | 2T | G16 | HA2 | 5.50 | 7.09E+03 |
| 1T         | A18 | H    | 2T | G16 | HA3 | 5.50 | 8.08E+03 |
| 1T         | A18 | HA   | 2T | I17 | H   | 4.67 | 2.56E+04 |
| 1T         | G19 | H    | 2T | I17 | HB  | 5.21 | 1.32E+04 |
| 1T         | G19 | H    | 2T | I17 | HA  | 5.31 | 1.19E+04 |
| 1T         | G19 | H    | 2T | I17 | QG2 | 5.34 | 1.14E+04 |
| 1T         | G19 | H    | 2T | I17 | H   | 5.50 | 7.06E+03 |
| 1T         | R21 | H    | 2T | G19 | QA  | 5.03 | 1.38E+04 |
| 1T         | R21 | HA   | 2T | Q20 | H   | 4.45 | 3.39E+04 |
| 1T         | R21 | QD   | 2T | Q20 | H   | 5.32 | 9.82E+03 |
| 1T         | G22 | H    | 2T | Q20 | QG  | 5.42 | 1.04E+04 |
| 1T         | V23 | QQG  | 2T | G22 | H   | 4.61 | 2.62E+04 |
| 1T         | V24 | H    | 2T | G22 | QA  | 4.97 | 1.50E+04 |
| 1T         | G25 | H    | 2T | V23 | HA  | 3.66 | 1.10E+05 |
| 1T         | G25 | H    | 2T | V23 | HB  | 4.73 | 2.36E+04 |
| 1T         | L26 | H    | 2T | V24 | HA  | 4.56 | 2.92E+04 |
| 1T         | Q15 | H    | 3T | G13 | H   | 5.43 | 1.03E+04 |
| 1T         | Q15 | HA   | 3T | G13 | H   | 5.22 | 1.30E+04 |

## S15

|    |     |      |    |     |      |      |          |
|----|-----|------|----|-----|------|------|----------|
| 1T | G16 | HA2  | 3T | Q15 | H    | 5.50 | 9.53E+04 |
| 1T | G16 | HA3  | 3T | Q15 | H    | 5.50 | 1.49E+04 |
| 1T | G16 | QA   | 3T | Q15 | H    | 4.70 | 1.49E+04 |
| 1T | I17 | H    | 3T | Q15 | HA   | 4.70 | 2.46E+04 |
| 1T | I17 | H    | 3T | Q15 | H    | 5.50 | 8.37E+03 |
| 1T | I17 | H    | 3T | Q15 | QG   | 5.50 | 9.51E+03 |
| 1T | I17 | HG12 | 3T | Q15 | H    | 5.50 | 5.89E+03 |
| 1T | I17 | HG13 | 3T | Q15 | H    | 5.50 | 9.44E+03 |
| 1T | I17 | QD1  | 3T | Q15 | HE22 | 4.39 | 3.70E+04 |
| 1T | I17 | QD1  | 3T | Q15 | QE2  | 3.63 | 7.91E+04 |
| 1T | I17 | QD1  | 3T | Q15 | HE21 | 4.39 | 7.91E+04 |
| 1T | I17 | QD1  | 3T | Q15 | H    | 5.50 | 4.32E+03 |
| 1T | I17 | QG1  | 3T | Q15 | QE2  | 4.02 | 3.67E+04 |
| 1T | I17 | H    | 3T | G16 | H    | 5.38 | 1.09E+04 |
| 1T | I17 | QG1  | 3T | G16 | H    | 4.99 | 1.47E+04 |
| 1T | I17 | QG2  | 3T | G16 | H    | 5.12 | 1.47E+04 |
| 1T | G19 | H    | 3T | Q15 | QG   | 5.33 | 1.15E+04 |
| 1T | G19 | QA   | 3T | Q15 | QE2  | 4.65 | 1.92E+04 |
| 1T | G19 | HA2  | 3T | A18 | H    | 5.50 | 8.48E+03 |
| 1T | G19 | HA3  | 3T | A18 | H    | 5.50 | 8.03E+03 |
| 1T | Q20 | H    | 3T | Q15 | QE2  | 4.46 | 1.89E+04 |
| 1T | Q20 | H    | 3T | Q15 | QG   | 4.58 | 2.86E+04 |
| 1T | Q20 | H    | 3T | Q15 | HE22 | 5.12 | 1.47E+04 |
| 1T | Q20 | H    | 3T | Q15 | HE21 | 5.12 | 1.89E+04 |
| 1T | Q20 | HA   | 3T | Q15 | QE2  | 5.30 | 9.99E+03 |
| 1T | Q20 | QG   | 3T | Q15 | QE2  | 4.16 | 4.58E+04 |
| 1T | Q20 | H    | 3T | I17 | QG2  | 5.50 | 6.24E+03 |
| 1T | Q20 | H    | 3T | A18 | HA   | 4.13 | 5.36E+04 |
| 1T | Q20 | H    | 3T | A18 | QB   | 4.53 | 3.06E+04 |
| 1T | Q20 | H    | 3T | G19 | H    | 4.37 | 3.77E+04 |
| 1T | Q20 | HA   | 3T | G19 | H    | 5.27 | 1.24E+04 |
| 1T | Q20 | HB2  | 3T | G19 | H    | 5.50 | 8.61E+03 |
| 1T | Q20 | HB3  | 3T | G19 | H    | 5.50 | 8.92E+03 |
| 1T | Q20 | QG   | 3T | G19 | H    | 5.50 | 6.76E+03 |
| 1T | G22 | QA   | 3T | R21 | H    | 4.91 | 1.62E+04 |
| 1T | V23 | H    | 3T | G19 | H    | 5.50 | 6.11E+03 |
| 1T | V23 | QQG  | 3T | Q20 | H    | 5.44 | 6.13E+03 |
| 1T | V23 | H    | 3T | R21 | HA   | 4.14 | 5.22E+04 |
| 1T | V23 | H    | 3T | R21 | QB   | 4.65 | 2.27E+04 |
| 1T | V23 | H    | 3T | R21 | H    | 5.50 | 4.81E+03 |
| 1T | V23 | QQG  | 3T | R21 | H    | 5.07 | 1.46E+04 |
| 1T | V23 | H    | 3T | G22 | H    | 5.07 | 1.56E+04 |
| 1T | V23 | QQG  | 3T | G22 | H    | 4.32 | 3.92E+04 |
| 1T | G25 | QA   | 3T | V24 | H    | 4.76 | 1.96E+04 |
| 1T | L26 | H    | 3T | R21 | HD3  | 5.50 | 9.18E+03 |
| 1T | L26 | H    | 3T | R21 | HD2  | 5.50 | 9.38E+03 |
| 1T | L26 | QB   | 3T | V24 | H    | 5.50 | 6.57E+03 |
| 1T | L26 | H    | 3T | G25 | H    | 5.20 | 1.34E+04 |
| 1T | L26 | HA   | 3T | G25 | H    | 5.17 | 1.39E+04 |
| 1T | L26 | QB   | 3T | G25 | H    | 4.69 | 2.49E+04 |
| 2T | G13 | H    | 3T | G13 | H    | 4.77 | 2.24E+04 |
| 2T | Q15 | H    | 3T | G13 | QA   | 4.48 | 1.84E+04 |
| 2T | Q15 | H    | 3T | G13 | HA3  | 5.14 | 1.84E+04 |
| 2T | Q15 | H    | 3T | G13 | HA2  | 5.14 | 1.44E+04 |
| 2T | Q15 | H    | 3T | P14 | QD   | 5.21 | 1.12E+04 |
| 2T | Q15 | QG   | 3T | I17 | H    | 4.68 | 2.52E+04 |
| 2T | G16 | H    | 3T | P14 | QG   | 4.01 | 5.70E+04 |
| 2T | G16 | H    | 3T | P14 | QD   | 4.92 | 1.60E+04 |
| 2T | A18 | H    | 3T | G16 | HA3  | 5.50 | 8.69E+03 |
| 2T | A18 | H    | 3T | G16 | HA2  | 5.50 | 8.57E+03 |
| 2T | A18 | HA   | 3T | I17 | H    | 4.26 | 4.43E+04 |
| 2T | G19 | H    | 3T | I17 | H    | 4.31 | 4.12E+04 |

## S16

|    |     |    |    |     |     |      |          |
|----|-----|----|----|-----|-----|------|----------|
| 2T | G19 | H  | 3T | I17 | QG2 | 5.23 | 1.30E+04 |
| 2T | G19 | H  | 3T | I17 | HA  | 5.28 | 1.22E+04 |
| 2T | G19 | H  | 3T | I17 | HB  | 5.40 | 1.07E+04 |
| 2T | R21 | H  | 3T | G19 | QA  | 5.11 | 1.27E+04 |
| 2T | R21 | HA | 3T | Q20 | H   | 4.31 | 4.10E+04 |
| 2T | R21 | QD | 3T | Q20 | H   | 5.34 | 7.46E+03 |
| 2T | R21 | QG | 3T | V23 | H   | 4.69 | 2.17E+04 |
| 2T | V24 | H  | 3T | G22 | QA  | 4.87 | 1.72E+04 |
| 2T | G25 | H  | 3T | V23 | HB  | 5.02 | 1.65E+04 |
| 2T | L26 | H  | 3T | L26 | H   | 4.93 | 1.84E+04 |
|    |     |    |    |     |     |      |          |

| NOE Statistics: |     |       |  | Distances        |     |       |
|-----------------|-----|-------|--|------------------|-----|-------|
| Intra residual  | 125 | 40.7% |  | 3 Å < dist < 4 Å | 58  | 18.9% |
| Sequential      | 79  | 25.7% |  | 4 Å < dist < 5 Å | 139 | 45.3% |
| Interchain      | 103 | 33.6% |  | 5 Å < dist < 6 Å | 110 | 35.8% |
| Total           | 307 |       |  | Total            | 307 |       |



Table S6. Torsion angles used for THP structure calculation.

| Residue            | $\phi$ |       | $\psi$ |       |
|--------------------|--------|-------|--------|-------|
|                    | from   | to    | from   | to    |
| <sup>1</sup> T I17 | -170.0 | -60.0 | 110.0  | 170.0 |
| <sup>2</sup> T I17 | -170.0 | -60.0 | 110.0  | 170.0 |
| <sup>3</sup> T I17 | -170.0 | -60.0 | 110.0  | 170.0 |
| <sup>1</sup> T Q20 | -170.0 | -60.0 | 110.0  | 170.0 |
| <sup>2</sup> T Q20 | -170.0 | -60.0 | 110.0  | 170.0 |
| <sup>3</sup> T Q20 | -170.0 | -60.0 | 110.0  | 170.0 |
| <sup>1</sup> T R21 | -170.0 | -60.0 | 110.0  | 170.0 |
| <sup>2</sup> T R21 | -170.0 | -60.0 | 110.0  | 170.0 |
| <sup>3</sup> T R21 | -170.0 | -60.0 | 110.0  | 170.0 |
| <sup>1</sup> T V23 | -170.0 | -60.0 | 110.0  | 170.0 |
| <sup>2</sup> T V23 | -170.0 | -60.0 | 110.0  | 170.0 |
| <sup>3</sup> T V23 | -170.0 | -60.0 | 110.0  | 170.0 |
| <sup>1</sup> T V24 | -170.0 | -60.0 | 110.0  | 170.0 |
| <sup>2</sup> T V24 | -170.0 | -60.0 | 110.0  | 170.0 |
| <sup>1</sup> T L26 | -170.0 | -60.0 | 110.0  | 170.0 |
| <sup>2</sup> T L26 | -170.0 | -60.0 | 110.0  | 170.0 |
| <sup>3</sup> T L26 | -170.0 | -60.0 | 110.0  | 170.0 |

34 dihedral angles selected from 17 residues.

Table S7. Upper limit distances for THP *N*- and *C*-terminal residues.

| Residue | 1   |     | Residue | 2   |      | Distance (Å) |
|---------|-----|-----|---------|-----|------|--------------|
| 1T      | G13 | H   | 2T      | P12 | HA   | 5.30         |
| 1T      | G13 | HA3 | 2T      | P12 | HA   | 5.30         |
| 1T      | G13 | HA3 | 3T      | P12 | HA   | 5.30         |
| 1T      | P14 | HB2 | 3T      | P12 | HB3  | 5.30         |
| 1T      | P14 | HD2 | 3T      | P12 | HG3  | 5.30         |
| 1T      | P27 | HA  | 2T      | L26 | H    | 5.30         |
| 1T      | P27 | HA  | 2T      | L26 | HD23 | 5.30         |
| 1T      | P27 | HA  | 3T      | G25 | H    | 5.30         |
| 1T      | P27 | HA  | 3T      | G25 | HA3  | 5.30         |
| 1T      | P27 | HB3 | 2T      | L26 | HG   | 5.30         |
| 1T      | P27 | HB3 | 2T      | L26 | HD21 | 5.30         |
| 1T      | P27 | HG2 | 2T      | L26 | HD21 | 5.30         |
| 1T      | P27 | HG3 | 2T      | L26 | H    | 5.30         |
| 1T      | G28 | H   | 3T      | G25 | H    | 5.30         |
| 1T      | G28 | H   | 3T      | G25 | HA3  | 5.30         |
| 1T      | G28 | HA2 | 3T      | G25 | H    | 5.30         |
| 1T      | G28 | HA3 | 3T      | G25 | HA3  | 5.30         |
| 2T      | P12 | HA  | 3T      | P11 | HD2  | 5.30         |
| 2T      | P12 | HB3 | 3T      | P11 | HB2  | 5.30         |
| 2T      | P12 | HB3 | 3T      | P11 | HG2  | 5.30         |
| 2T      | P12 | HB3 | 3T      | P11 | HD2  | 5.30         |
| 2T      | P12 | HD3 | 3T      | P11 | HD2  | 5.30         |
| 2T      | G13 | H   | 3T      | P12 | HA   | 5.30         |
| 2T      | G13 | HA3 | 3T      | P12 | HA   | 5.30         |
| 2T      | P27 | HA  | 3T      | G25 | HA3  | 5.30         |
| 2T      | P27 | HA  | 3T      | L26 | H    | 5.30         |
| 2T      | P27 | HA  | 3T      | L26 | HB2  | 5.30         |
| 2T      | P27 | HA  | 3T      | L26 | HD23 | 5.30         |
| 2T      | P27 | HB2 | 3T      | L26 | HB2  | 5.30         |
| 2T      | P27 | HB3 | 3T      | L26 | H    | 5.30         |
| 2T      | P27 | HB3 | 3T      | L26 | HG   | 5.30         |
| 2T      | P27 | HG3 | 3T      | L26 | HD23 | 5.30         |
| 2T      | P27 | HD3 | 3T      | L26 | HD23 | 5.30         |
| 2T      | G13 | H   | 3T      | P11 | O    | 2.40         |
| 1T      | G28 | H   | 2T      | L26 | O    | 2.40         |

33 interchain distances selected.

+ 2 interchain hydrogen bonds.

Table S8. Torsion angles used for THP *N*- and *C*-terminal residues.

| Residue           | $\phi$ |       | $\psi$ |       |
|-------------------|--------|-------|--------|-------|
|                   | from   | to    | from   | to    |
| <sup>1</sup> TG13 | -170.0 | -60.0 | 110.0  | 170.0 |
| <sup>1</sup> TP14 |        |       | 110.0  | 170.0 |
| <sup>1</sup> TP27 |        |       | 110.0  | 170.0 |
| <sup>1</sup> TG28 | -170.0 | -60.0 | 110.0  | 170.0 |
| <sup>2</sup> TP12 |        |       | 110.0  | 170.0 |
| <sup>2</sup> TG13 | -170.0 | -60.0 | 110.0  | 170.0 |
| <sup>2</sup> TP27 |        |       | 110.0  | 170.0 |
| <sup>3</sup> TP11 |        |       | 110.0  | 170.0 |
| <sup>3</sup> TP12 |        |       | 110.0  | 170.0 |
| <sup>3</sup> TG25 | -170.0 | -60.0 | 110.0  | 170.0 |
|                   |        |       |        |       |

14 dihedral angles selected from 10 residues.

Table S9. Statistical analysis of the NMR structures of the THP (pH 7.2, 298 K).

|                                                                       |                   |
|-----------------------------------------------------------------------|-------------------|
| <b>Restraints used for calculation:</b>                               |                   |
| <b>Total number of NOE restraints</b>                                 | 307               |
| (Medium range: from (i,i+2) to (i,i+5))                               |                   |
| Intra-residue                                                         | 125               |
| Sequential                                                            | 78                |
| Medium range                                                          | 1                 |
| Long range                                                            | 103               |
|                                                                       |                   |
| <b>Dihedral angle restraints</b>                                      | 34                |
| Phi                                                                   | 17                |
| Psi                                                                   | 17                |
|                                                                       |                   |
| Average number of restraints per residue                              | 8                 |
|                                                                       |                   |
| <b>RMS violations per constraint (structure averaged)<sup>a</sup></b> |                   |
| Intra-residue                                                         | 0.0276 ± 0.0068 Å |
| Sequential                                                            | 0.0220 ± 0.0058 Å |
| Long range                                                            | 0.0486 ± 0.0063 Å |
| Total:                                                                | 0.0354 ± 0.0036 Å |
|                                                                       |                   |
| Average no. of violations > 0.3 Å:                                    | 0.1667 ± 0.3727   |
| Average no. of violations 0.1 << 0.3 Å:                               | 12.2667 ± 2.7681  |
|                                                                       |                   |
|                                                                       |                   |
| Average backbone RMSD to mean                                         | 0.84 ± 0.26 Å     |
| Average heavy atom RMSD to mean                                       | 1.32 ± 0.27 Å     |
|                                                                       |                   |
| <b>Ramachandran plot:</b>                                             |                   |
| Percentage of residues present in core regions                        | 78.3%             |
| Percentage of residues present in allowed regions                     | 20.0%             |
| Percentage of residues present in generously allowed regions          | 1.2%              |
| Percentage of residues present in disallowed regions                  | 0.6%              |
|                                                                       |                   |
|                                                                       |                   |

<sup>a</sup> The data are calculated over the 30 conformers representing the NMR structure. The mean value and the standard deviation are given.

<sup>b</sup> The RMSD to the mean coordinates of 30 conformers was calculated for the atom of residues included between 13 and 26 on the three chains.

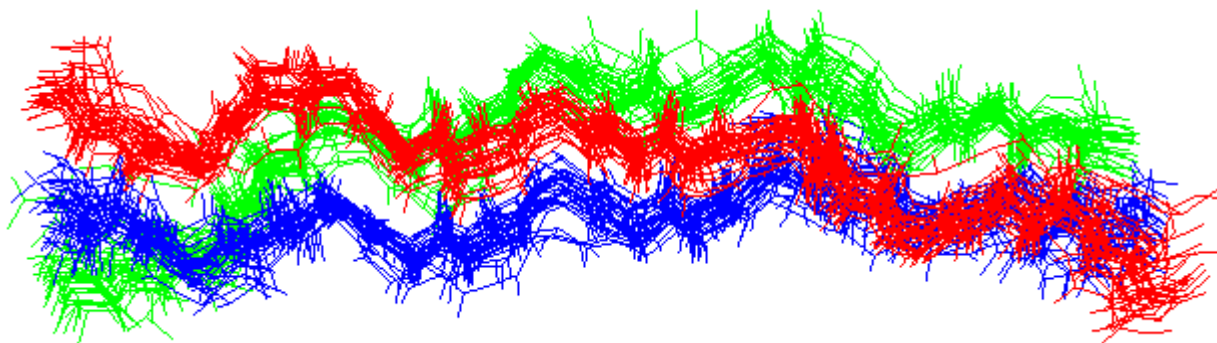

**Figure S1.** Solution structure of the  $\alpha 1(I)772-786$  THP. The three chains forming the THP are 1T (green), 2T (blue), and 3T (red).

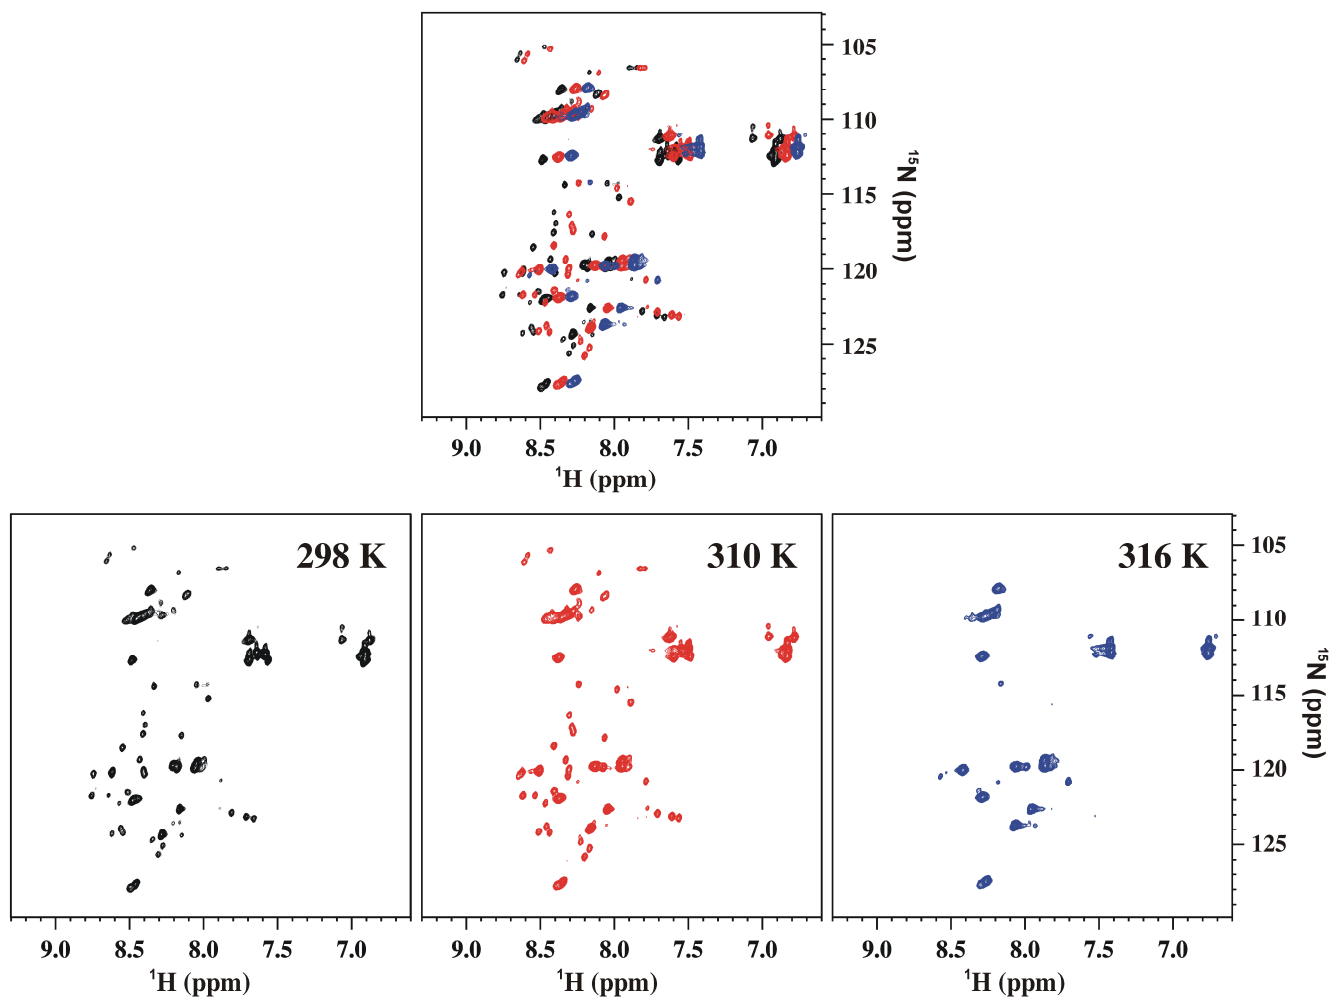

**Figure S2.**  $^1\text{H}$ - $^{15}\text{N}$  HSQC spectra of the THP at 298 K (black peaks), 310 K (red peaks), and 316 K (blue peaks). At 310 K all of the amide peaks of the THP are shifted but still intense. At 316 K the intensity of the THP cross-peaks are drastically reduced with only the resonances corresponding to the isolated chain remaining visible and intense.

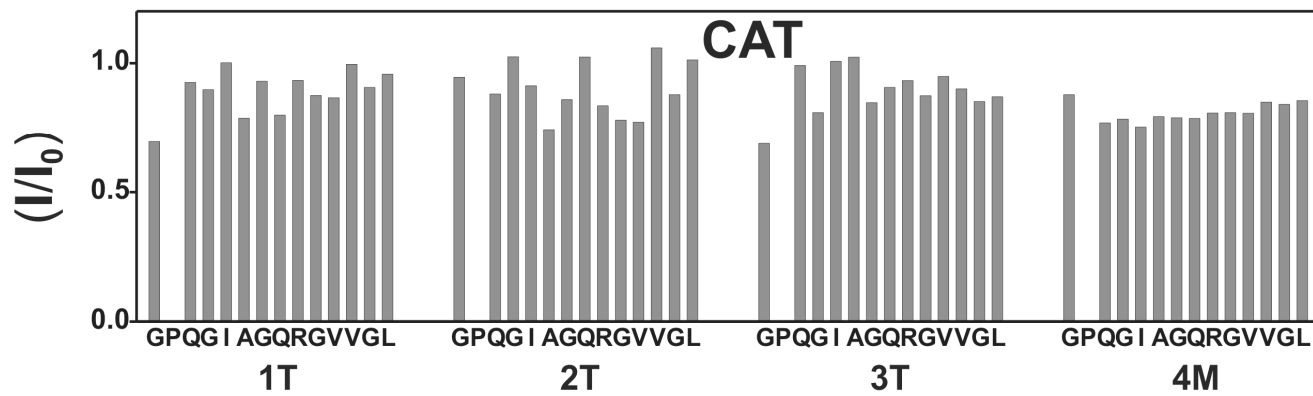

**Figure S3.** Intensity changes per residue observed at 310 K in the  $^{13}\text{C},^{15}\text{N}$  THP upon the addition of unlabeled CAT (0.2 eq). Greater preference for 4M is indicated by the greater overall decrease in signal intensity.

**Figure S4.** Energetics of collagenolysis.**Step 1: experiment-based initial complex**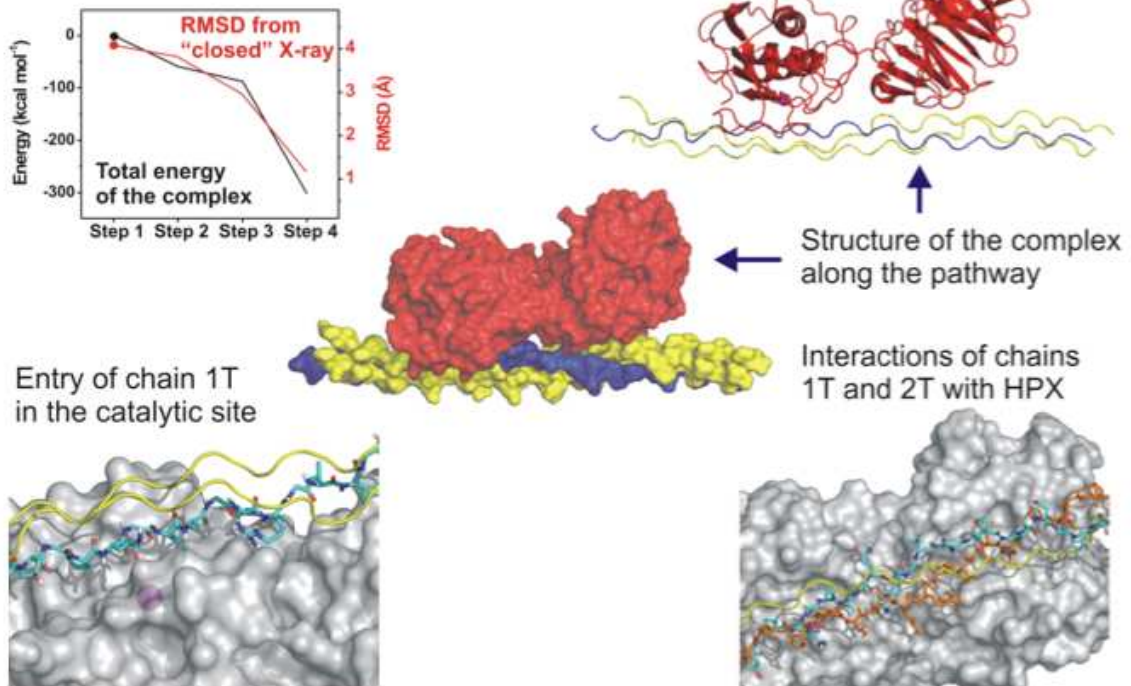**Step 2: tightening of the complex**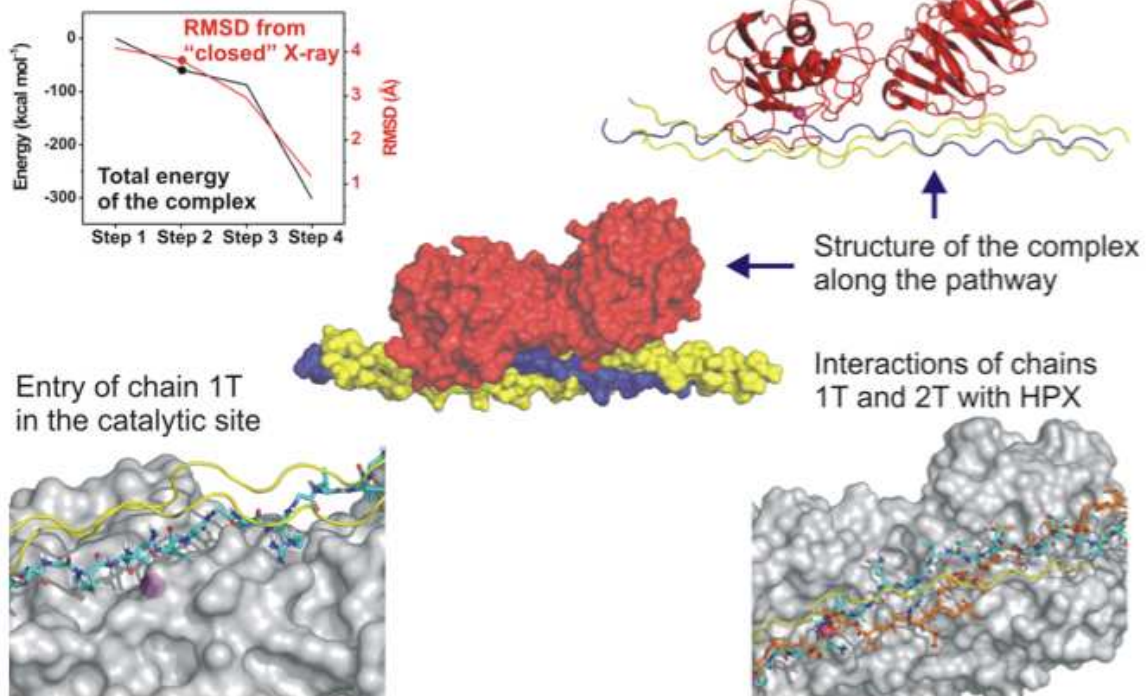



### Step 3: FL-MMP rewinding and THP distortion

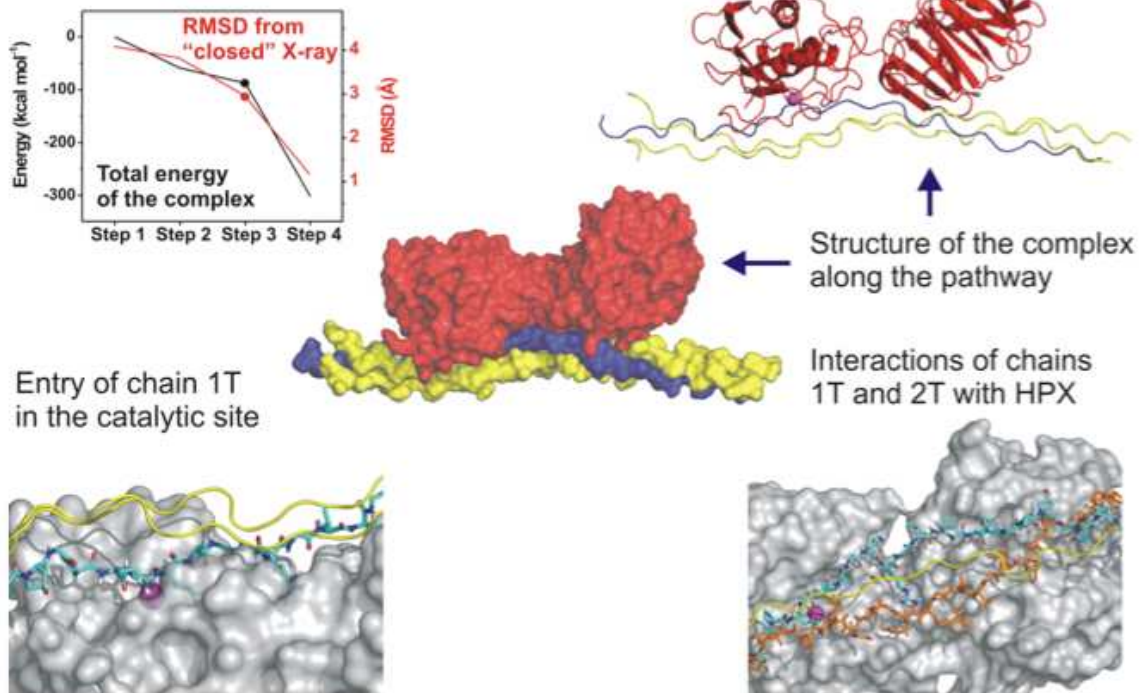

### Step 4: FL-MMP closing (X-ray) and THP unwinding

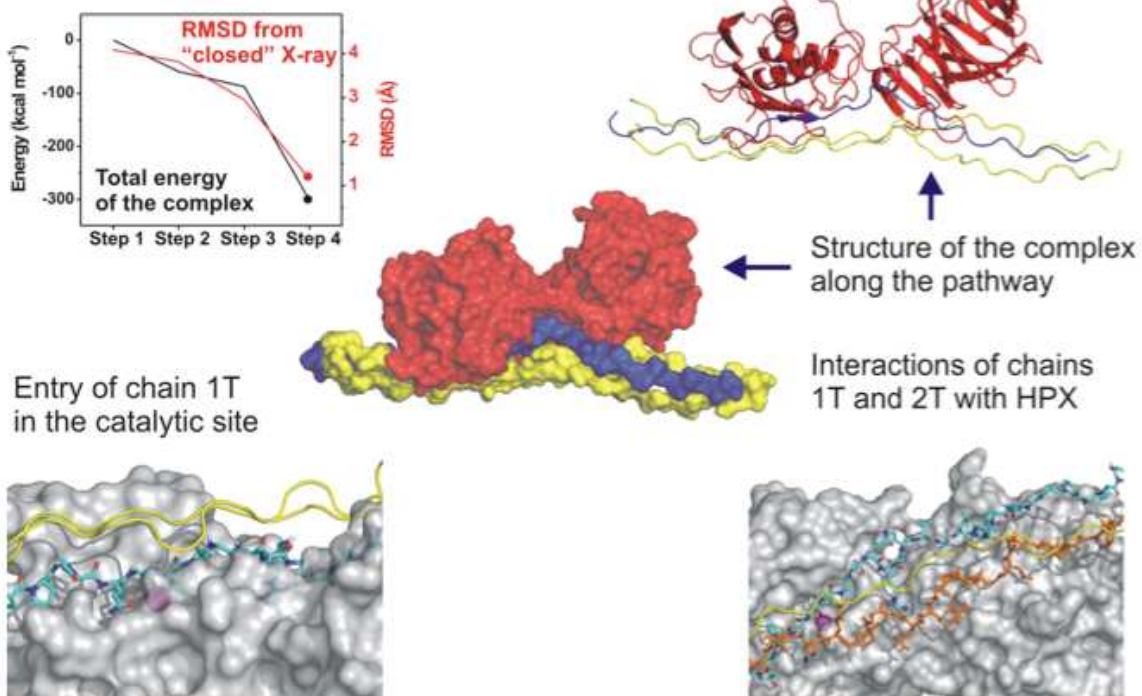

Supplement: NIHMS346999-supplement-1_si_001.pdf [file NIHMS346999-supplement-1_si_001.pdf]
